# Supplementary material
Source: PubMed Central journal article supplement (PMC7375885)
Supplement: BLT-18-261_Appendix_1.pdf [file BLT-18-261_Appendix_1.pdf]

**APPENDIX 1****Turkish Society of Anaesthesiology and Reanimation Patient Blood Management Group**

|                       |                                                                                                                                               |
|-----------------------|-----------------------------------------------------------------------------------------------------------------------------------------------|
| Alanoglu Zekeriyya    | Department of Anaesthesiology and Reanimation, Ankara University Medical Faculty, Ankara, Turkey                                              |
| Aydinli Bahar         | Department of Anaesthesiology and Reanimation, Mersin City Hospital, Mersin, Turkey                                                           |
| Bermede Ahmet Onat    | Department of Anaesthesiology and Reanimation, Ankara University Medical Faculty, Ankara, Turkey                                              |
| Bilgin Hulya          | Department of Anaesthesiology and Reanimation, Bursa Uludag University Medical Faculty, Bursa, Turkey                                         |
| Buget Mehmet          | Department of Anaesthesiology, Istanbul University Medical Faculty, Istanbul, Turkey                                                          |
| Coskunfirat Nesil     | Department of Anaesthesiology and Reanimation, Akdeniz University Medical Faculty, Antalya, Turkey                                            |
| Demir Asli            | Department of Anaesthesiology and Reanimation, University of Health Sciences Ankara City Hospital, Ankara, Turkey                             |
| Goren Suna            | Department of Anaesthesiology and Reanimation, Bursa Uludag University Medical Faculty, Bursa, Turkey                                         |
| Guner Can Meltem      | Department of Anaesthesiology and Reanimation, Acibadem Mehmet Ali Aydinlar University School of Medicine, Atakent Hospital, Istanbul, Turkey |
| Orhan Mukadder        | Department of Anaesthesiology, Istanbul University Medical Faculty, Istanbul, Turkey                                                          |
| Senturk Mert          | Department of Anaesthesiology, Istanbul University Medical Faculty, Istanbul, Turkey                                                          |
| Tezcan Busra          | Department of Anaesthesiology and Reanimation, University of Health Sciences Ankara City Hospital, Ankara, Turkey                             |
| Toprak Huseyin Ilksen | Department of Anaesthesiology, Inonu University Liver Transplantation Institute, Malatya, Turkey                                              |
| Yildirim Guclu Cigdem | Department of Anaesthesiology and Reanimation, Ankara University Medical Faculty, Ankara, Turkey                                              |

**Turkish National Peri-operative Transfusion Study Investigators**

|                      |                                                                                                                                                     |
|----------------------|-----------------------------------------------------------------------------------------------------------------------------------------------------|
| Abitagaoglu Suheyila | Department of Anaesthesiology and Reanimation, University of Health Sciences Fatih Sultan Mehmet Teaching Hospital, Istanbul, Turkey                |
| Abut Yesim           | Department of Anaesthesiology and Reanimation, University of Health Sciences Istanbul Teaching Hospital, Istanbul, Turkey                           |
| Akdaglı Ekici Arzu   | Department of Anaesthesiology and Reanimation, Hitit University, School of Medicine, Corum Erol Olcok Teaching Hospital, Corum, Turkey              |
| Akdas Tekin Esra     | Department of Anaesthesiology and Reanimation, University of Health Sciences Okmeydanı Teaching Hospital, Istanbul, Turkey                          |
| Akdogan Ali          | Department of Anaesthesiology and Reanimation, Karadeniz Technical University Medical Faculty Farabi Hospital, Trabzon, Turkey                      |
| Akin Mine            | Department of Anaesthesiology, University of Health Sciences Ankara Child Health and Diseases Hematology Oncology Teaching Hospital, Ankara, Turkey |
| Akovali Nukhet       | Department of Anaesthesiology and Reanimation, Baskent University Medical Faculty Ankara Hospital, Ankara, Turkey                                   |
| Aksoy Semsî Mustafa  | Department of Anaesthesiology and Reanimation, Ankara Ataturk Teaching Hospital, Ankara, Turkey                                                     |
| Alaygut Ergin        | Department of Anaesthesiology and Reanimation, University of Health Sciences Izmir Tepecik Teaching Hospital, Izmir, Turkey                         |
| Arar Makbule Cavidan | Department of Anaesthesiology and Reanimation, Namik Kemal University Medical Faculty, Tekirdag, Turkey                                             |
| Arican Sule          | Department of Anaesthesiology and Reanimation, Necmettin Erbakan University Meram Medical Faculty, Konya, Turkey                                    |
| Arici Ayse Gulbin    | Department of Anaesthesiology and Reanimation, Akdeniz University Medical Faculty, Antalya, Turkey                                                  |
| Arik Emine           | Department of Anaesthesiology and Reanimation, University of Health Sciences Diskapi Yildirim Beyazit Teaching Hospital, Ankara, Turkey             |
| Arik Esma            | Department of Anaesthesiology and Reanimation, Gazi University Medical Faculty, Ankara, Turkey                                                      |
| Arsilan Mahmut       | Department of Anaesthesiology and Reanimation, Sutcu Imam University Medical Faculty, Kahramanmaraş, Turkey                                         |
| Ay Necmiye           | Department of Anaesthesiology and Reanimation, University of Health Sciences Kanuni Sultan Suleyman Teaching Hospital, Istanbul, Turkey             |
| Aykac Zuhale         | Department of Anaesthesiology and Reanimation, Marmara University Pendik Teaching Hospital, Istanbul, Turkey                                        |
| Ayoglu Hilal         | Department of Anaesthesiology and Reanimation, Zonguldak Bulent Ecevit University Medical Faculty Center for Health and Research, Zonguldak, Turkey |
| Basaran Cumhur       | Department of Anaesthesiology and Reanimation, University of Health Sciences Ankara Teaching Hospital, Ankara, Turkey                               |
| Baytas Volkan        | Department of Anaesthesiology and Reanimation, Ankara University Medical Faculty, Ankara, Turkey                                                    |
| Bedirli Nurdan       | Department of Anaesthesiology and Reanimation, Gazi University Medical Faculty, Ankara, Turkey                                                      |
| Bestas Azize         | Department of Anaesthesiology and Reanimation, Fırat University Medical Faculty, Elazığ, Turkey                                                     |
| Bigat Zekiye         | Department of Anaesthesiology and Reanimation, Akdeniz University Medical Faculty, Antalya, Turkey                                                  |
| Bilgin Mehmet Ugur   | Department of Anaesthesiology and Reanimation, University of Health Sciences Izmir Bozyaka Teaching Hospital, Izmir, Turkey                         |
| Boran Omer Faruk     | Department of Anaesthesiology and Reanimation, Sutcu Imam University Medical Faculty, Kahramanmaraş, Turkey                                         |
| Buyukcoban Sibel     | Department of Anaesthesiology and Reanimation, Dokuz Eylul University Medical Faculty, Izmir, Turkey                                                |
| Cakar Turhan Sanem   | Department of Anaesthesiology and Reanimation, Ankara University Medical Faculty, Ankara, Turkey                                                    |
| Cakmak Meltem        | Department of Anaesthesiology and Reanimation, University of Health Sciences Izmir Tepecik Teaching Hospital, Izmir, Turkey                         |
| Cankaya Baris        | Department of Anaesthesiology and Reanimation, Marmara University Pendik Teaching Hospital, Istanbul, Turkey                                        |
| Capar Ayse           | Department of Anaesthesiology and Reanimation, University of Health Sciences Kayseri Teaching Hospital, Kayseri, Turkey                             |
| Cebeci Zubeyir       | Department of Anaesthesiology and Reanimation, Ordu University Medical Faculty, Ordu, Turkey                                                        |
| Cetinkaya Ethemoglu  |                                                                                                                                                     |
| Filiz Banu           | Department of Anaesthesiology and Reanimation, Yenimahalle Teaching Hospital, Ankara, Turkey                                                        |
| Cicekci Faruk        | Department of Anaesthesiology and Reanimation, Selcuk University Medical Faculty, Konya, Turkey                                                     |
| Colak Alkin          | Department of Anaesthesiology and Reanimation, Trakya University Medical Faculty, Edirne, Turkey                                                    |
| Colak Yusuf Ziya     | Department of Anaesthesiology, Inonu University Liver Transplantation Institute, Malatya, Turkey                                                    |
| Dagli Esra           | Department of Anaesthesiology and Reanimation, University of Health Sciences Okmeydanı Teaching Hospital, Istanbul, Turkey                          |
| Demir Hafize Fisun   | Department of Anaesthesiology and Reanimation, Balikesir University Medical Faculty Teaching Hospital, Balikesir, Turkey                            |
| Derbent Abdurrahim   | Department of Anaesthesiology and Reanimation, University of Health Sciences Kanuni Sultan Suleyman Teaching Hospital, Istanbul, Turkey             |

|                        |                                                                                                                                                         |
|------------------------|---------------------------------------------------------------------------------------------------------------------------------------------------------|
| Dumanlı Ozcan Ayca     | Department of Anaesthesiology and Reanimation, Ankara Atatürk Teaching Hospital, Ankara, Turkey                                                         |
| Ekinci Osman           | Department of Anaesthesiology and Reanimation, University of Health Sciences Haydarpaşa Numune Teaching Hospital, Istanbul, Turkey                      |
| Erdogan Kayhan Gulay   | Department of Anaesthesiology and Reanimation, Eskisehir Osmangazi University Medical Faculty, Eskisehir, Turkey                                        |
| Erturk Engin           | Department of Anaesthesiology and Reanimation, Karadeniz Technical University Medical Faculty Farabi Hospital, Trabzon, Turkey                          |
| Erus Ipek              | Department of Anaesthesiology and Reanimation, University of Health Sciences Umraniye Teaching Hospital, Istanbul, Turkey                               |
| Esen Tekeli Arzu       | Department of Anaesthesiology and Reanimation, Van Yuzuncu yıl University Medical Faculty Dursun Odabasi Medical Center, Van, Turkey                    |
| Gamli Mehmet           | Department of Anaesthesiology and Reanimation, University of Health Sciences Yuksek Ihtisas Teaching Hospital, Bursa, Turkey                            |
| Gulel Basak            | Department of Anaesthesiology and Reanimation, University of Health Sciences Diskapi Yildirim Beyazit Teaching Hospital, Ankara, Turkey                 |
| Gulgun Gamze           | Department of Anaesthesiology and Reanimation, Tunceli State Hospital, Tunceli, Turkey                                                                  |
| Gunduz Emel            | Department of Anaesthesiology and Reanimation, Akdeniz University Medical Faculty, Antalya, Turkey                                                      |
| Gunes Isin             | Department of Anaesthesiology and Reanimation, Erciyes University, Medical Faculty, Kayseri, Turkey                                                     |
| Guyen Aytaç Betül      | Department of Anaesthesiology, University of Health Sciences Etilik Zubeyde Hanim Gynecology and Obstetrics Teaching Hospital, Ankara, Turkey           |
| Hacibeyoglu Gulcin     | Department of Anaesthesiology and Reanimation, Necmettin Erbakan University Meram Medical Faculty, Konya, Turkey                                        |
| Has Selmi Nazan        | Department of Anaesthesiology and Reanimation, University of Health Sciences Ankara Numune Teaching Hospital, Ankara, Turkey                            |
| Ilgaz Kocuyigit Ozgen  | Department of Anaesthesiology and Reanimation, Acibadem Mehmet Ali Aydınlar University School of Medicine, Atakent Hospital, Istanbul, Turkey           |
| Ilksen Egilmez Ayse    | Department of Anaesthesiology and Reanimation, University of Health Sciences Konya Teaching Hospital, Konya, Turkey                                     |
| Iyigun Muzeyyen        | Department of Anaesthesiology and Reanimation, Acibadem Mehmet Ali Aydınlar University School of Medicine, Atakent Hospital, Istanbul, Turkey           |
| Kara Inci              | Department of Anaesthesiology and Reanimation, Selcuk University Medical Faculty, Konya, Turkey                                                         |
| Karakaya Deniz         | Department of Anaesthesiology and Reanimation, Ondokuz Mayıs University Medical Faculty, Samsun, Turkey                                                 |
| Karasu Derya           | Department of Anaesthesiology and Reanimation, University of Health Sciences Yuksek Ihtisas Teaching Hospital, Bursa, Turkey                            |
| Karaveli Arzu          | Department of Anaesthesiology and Reanimation, University of Health Sciences Antalya Teaching Hospital, Antalya, Turkey                                 |
| Kavas Ayse Duygu       | Department of Anaesthesiology and Reanimation, University of Health Sciences Umraniye Teaching Hospital, Istanbul, Turkey                               |
| Kaya Menseure          | Department of Anaesthesiology and Reanimation, University of Health Sciences Dr Abdurrahman Yurtaslan Ankara Oncology Teaching Hospital, Ankara, Turkey |
| Kaya Suleyman          | Department of Anaesthesiology and Reanimation, Ankara Atatürk Teaching Hospital, Ankara, Turkey                                                         |
| Kazak Bengisun Zuleyha | Department of Anaesthesiology and Reanimation, Ufuk University School of Medicine, Ankara, Turkey                                                       |
| Keskin Gulsen          | Department of Anaesthesiology, University of Health Sciences Ankara Child Health and Diseases Hematology Oncology Teaching Hospital, Ankara, Turkey     |
| Kilci Oya              | Department of Anaesthesiology and Reanimation, University of Health Sciences Ankara Numune Teaching Hospital, Ankara, Turkey                            |
| Kilic Yeliz            | Department of Anaesthesiology and Reanimation, Eskisehir Osmangazi University Medical Faculty, Eskisehir, Turkey                                        |
| Kirdemir Pakize        | Department of Anaesthesiology and Reanimation, Suleyman Demirel University Medical Faculty, Isparta, Turkey                                             |
| Koc Zeynep             | Department of Anaesthesiology and Reanimation, University of Health Sciences Kayseri Teaching Hospital, Kayseri, Turkey                                 |
| Koksal Ceren           | Department of Anaesthesiology and Reanimation, University of Health Sciences Fatih Sultan Mehmet Teaching Hospital, Istanbul, Turkey                    |
| Kozanhan Betül         | Department of Anaesthesiology and Reanimation, University of Health Sciences Konya Teaching Hospital, Konya, Turkey                                     |
| Kucukguclu Semih       | Department of Anaesthesiology and Reanimation, Dokuz Eylul University Medical Faculty, Izmir, Turkey                                                    |
| Kucukosman Gamze       | Department of Anaesthesiology and Reanimation, Zonguldak Bulent Ecevit University Medical Faculty Center for Health and Research, Zonguldak, Turkey     |
| Kupeli Ilke            | Department of Anaesthesiology and Reanimation, Ministry of Health Erzincan University Menguçek Gazi Teaching Hospital, Erzincan, Turkey                 |
| Kurtay Aysun           | Department of Anaesthesiology and Reanimation, University of Health Sciences Kecioren Teaching Hospital, Ankara, Turkey                                 |
| Kurtipek Omer          | Department of Anaesthesiology and Reanimation, Gazi University Medical Faculty, Ankara, Turkey                                                          |
| Meco Basak Ceyda       | Department of Anaesthesiology and Reanimation, Ankara University Medical Faculty, Ankara, Turkey                                                        |
| Nalbant Burak          | Department of Anaesthesiology and Reanimation, University of Health Sciences Diskapi Yildirim Beyazit Teaching Hospital, Ankara, Turkey                 |
| Okuy Rahsan Dilek      | Department of Anaesthesiology and Reanimation, Zonguldak Bulent Ecevit University Medical Faculty Center for Health and Research, Zonguldak, Turkey     |
| Omur Dilek             | Department of Anaesthesiology and Reanimation, Dokuz Eylul University Medical Faculty, Izmir, Turkey                                                    |
| Orak Yavuz             | Department of Anaesthesiology and Reanimation, Sutcu Imam University Medical Faculty, Kahramanmaraş, Turkey                                             |
| Ounde Elif             | Department of Anaesthesiology and Reanimation, University of Health Sciences Haydarpaşa Numune Teaching Hospital, Istanbul, Turkey                      |
| Özayar Esra            | Department of Anaesthesiology and Reanimation, University of Health Sciences Kecioren Teaching Hospital, Ankara, Turkey                                 |
| Ozcelik Menekse        | Department of Anaesthesiology and Reanimation, Ankara University Medical Faculty, Ankara, Turkey                                                        |
| Ozden Eyup Sabri       | Department of Anaesthesiology and Reanimation, Suleyman Demirel University Medical Faculty, Isparta, Turkey                                             |
| Ozer Yetkin            | Department of Anaesthesiology and Reanimation, Anadolu Health Center, Istanbul, Turkey                                                                  |
| Ozgok Aysegul          | Department of Anaesthesiology and Reanimation, University of Health Sciences Ankara City Hospital, Ankara, Turkey                                       |
| Ozhan Mehmet Ozgur     | Department of Anaesthesiology and Reanimation, Private Cankaya Hospital, Ankara, Turkey                                                                 |
| Ozlu Onur              | Department of Anaesthesiology, University of Economics and Technology, Medical Faculty Hospital, Ankara, Turkey                                         |
| Sagır Ozlem            | Department of Anaesthesiology and Reanimation, Balikesir University Medical Faculty Teaching Hospital, Balikesir, Turkey                                |
| Saglik Arzu            | Department of Anaesthesiology and Reanimation, University of Health Sciences Kayseri Teaching Hospital, Kayseri, Turkey                                 |
| Sagun Aslinur          | Department of Anaesthesiology and Reanimation, Mersin University Medical Faculty, Mersin, Turkey                                                        |
| Sahap Mehmet           | Department of Anaesthesiology and Reanimation, University of Health Sciences Kecioren Teaching Hospital, Ankara, Turkey                                 |
| Sahin Cihan            | Department of Anaesthesiology, University of Economics and Technology, Medical Faculty Hospital, Ankara, Turkey                                         |

|                         |                                                                                                                                                         |
|-------------------------|---------------------------------------------------------------------------------------------------------------------------------------------------------|
| Sahiner Yeliz           | Department of Anaesthesiology and Reanimation, Hitit University, School of Medicine, Corum Erol Olcok Teaching Hospital, Corum, Turkey                  |
| Salman Nevriye          | Department of Anaesthesiology and Reanimation, University of Health Sciences Ankara City Hospital, Ankara, Turkey                                       |
| Saracoglu Ayten         | Department of Anaesthesiology and Reanimation, Marmara University Pendik Teaching Hospital, Istanbul, Turkey                                            |
| Saracoglu Kemal Tolga   | Department of Anaesthesiology and Reanimation, University of Health Sciences Kartal Dr. Lutfi Kirdar Teaching Hospital, Istanbul, Turkey                |
| Sarizeybek Hilal        | Department of Anaesthesiology and Reanimation, University of Health Sciences Derince Teaching Hospital, Kocaeli, Turkey                                 |
| Selcuk Sert Gokce       | Department of Anaesthesiology and Reanimation, University of Health Sciences Ankara City Hospital, Ankara, Turkey                                       |
| Sen Betul               | Department of Anaesthesiology and Reanimation, Istanbul Medeniyet University Goztepe Teaching Hospital, Istanbul, Turkey                                |
| Sen Ozlem               | Department of Anaesthesiology and Reanimation, University of Health Sciences Dr Abdurrahman Yurtaslan Ankara Oncology Teaching Hospital, Ankara, Turkey |
| Sener Elif Bengi        | Department of Anaesthesiology and Reanimation, Ondokuz Mayıs University Medical Faculty, Samsun, Turkey                                                 |
| Sengul Fatma Isil       | Department of Anaesthesiology and Reanimation, University of Health Sciences Antalya Teaching Hospital, Antalya, Turkey                                 |
| Silay Emin              | Department of Anaesthesiology and Reanimation, University of Health Sciences Kayseri Teaching Hospital, Kayseri, Turkey                                 |
| Subası Ferhunde Dilek   | Department of Anaesthesiology and Reanimation, University of Health Sciences Haydarpaşa Numune Teaching Hospital, Istanbul, Turkey                      |
| Tarikci Kilic Ebru      | Department of Anaesthesiology and Reanimation, University of Health Sciences Umraniye Teaching Hospital, Istanbul, Turkey                               |
| Tas Nilay               | Department of Anaesthesiology and Reanimation, Ordu University Medical Faculty, Ordu, Turkey                                                            |
| Tekgul Zeki Tuncel      | Department of Anaesthesiology and Reanimation, University of Health Sciences Izmir Bozyaka Teaching Hospital, Izmir, Turkey                             |
| Tekgunduz Sibel         | Department of Child Health and Diseases, University of Health Sciences Kecioren Teaching Hospital, Ankara, Turkey                                       |
| Tezcan Keles Gonul      | Department of Anaesthesiology and Reanimation, Manisa Celal Bayar University Medical Faculty Hafsa Sultan Hospital, Manisa, Turkey                      |
| Topcu Hulya             | Department of Anaesthesiology and Reanimation, Hitit University, School of Medicine, Corum Erol Olcok Teaching Hospital, Corum, Turkey                  |
| Tunay Abdurrahman       | Department of Anaesthesiology and Reanimation, University of Health Sciences Istanbul Teaching Hospital, Istanbul, Turkey                               |
| Ugun Fatih              | Department of Anaesthesiology and Reanimation, Balikesir University Medical Faculty Teaching Hospital, Balikesir, Turkey                                |
| Un Canan                | Department of Anaesthesiology and Reanimation, University of Health Sciences Ankara Numune Teaching Hospital, Ankara, Turkey                            |
| Unal Petek              | Department of Anaesthesiology and Reanimation, University of Health Sciences Haydarpaşa Numune Teaching Hospital, Istanbul, Turkey                      |
| Unver Suheyyla          | Department of Anaesthesiology and Reanimation, University of Health Sciences Dr Abdurrahman Yurtaslan Ankara Oncology Teaching Hospital, Ankara, Turkey |
| Ural Sedef Gulcin       | Department of Anaesthesiology and Reanimation, Osmaniye State Hospital, Osmaniye, Turkey                                                                |
| Uzumcugil Filiz         | Department of Anaesthesiology and Reanimation, Hacettepe University School of Medicine, Ankara, Turkey                                                  |
| Yerebakan Akesen Selcan | Department of Anaesthesiology and Reanimation, Bursa Uludag University Medical Faculty, Bursa, Turkey                                                   |
| Yesildal Kadir          | Department of Anaesthesiology and Reanimation, University of Health Sciences Okmeydanı Teaching Hospital, Istanbul, Turkey                              |
| Yildirim Mustafa        | Department of Anaesthesiology and Reanimation, University of Health Sciences Diskapi Yildirim Beyazit Teaching Hospital, Ankara, Turkey                 |
| Yildiz Altun Aysun      | Department of Anaesthesiology and Reanimation, Fırat University Medical Faculty, Elazığ, Turkey                                                         |
| Yildiz Munise           | Department of Anaesthesiology and Reanimation, University of Health Sciences Konya Teaching Hospital, Konya, Turkey                                     |
| Yilmaz Erisen Hatice    | Department of Anaesthesiology and Reanimation, University of Health Sciences Izmir Tepecik Teaching Hospital, Izmir, Turkey                             |
| Yilmaz Hakan            | Department of Anaesthesiology and Reanimation, Ufuk University School of Medicine, Ankara, Turkey                                                       |
| Yilmaz Mehmet           | Department of Anaesthesiology and Reanimation, University of Health Sciences Derince Teaching Hospital, Kocaeli, Turkey                                 |
| Yuzkat Nureddin         | Department of Anaesthesiology and Reanimation, Van Yuzuncu Yil University Medical Faculty Dursun Odabasi Medical Center, Van, Turkey                    |
